# Supplementary material for: A critical analysis of Iranian buy-back transactions in the context of international petroleum contractual systems
Source: PLOS journal article supplement (doi:10.1371/journal.pone.0006086), 2008-01-01
Supplement: S2 (10.1371/journal.pone.0006086.s002) [file journal.pone.0006086.s002]

## Supplementary Figure S2

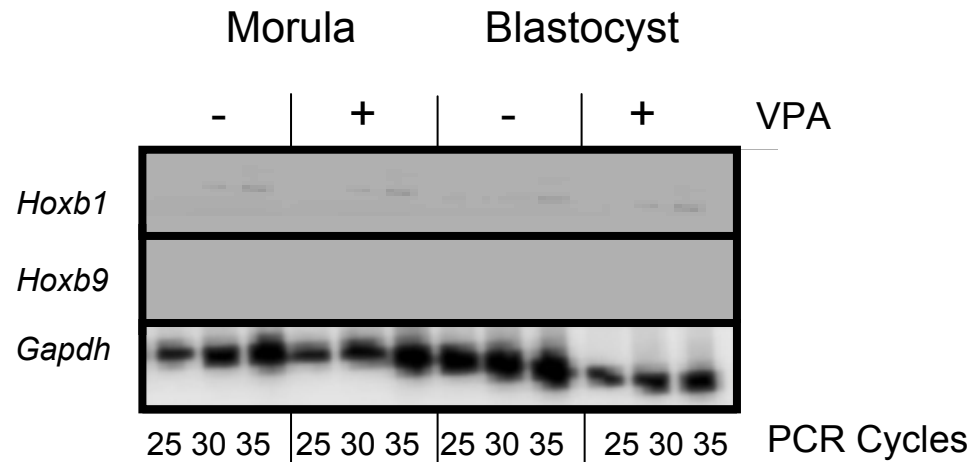

### *Hox Gene Expression Analysis by radioactive PCR*

Expression of *Hoxb1*, *Hoxb9* and *Gapdh* in morula or blastocyst-stage embryos cultured for 18h from the 8-cell to morula stage either with (+) or without (-) 1mM valproic acid (VPA) as indicated. High purity cDNA was obtained from purified mRNA and analysed by radioactive PCR as described by O'Neill, L.P. et al.

Nat Genet. 38, 835-841 (2006). Samples were taken at 25, 30 and 35 cycles as indicated.
